# Supplementary material for: ANKS1B encoded AIDA-1 regulates social behaviors by controlling oligodendrocyte function
Source: PubMed Central journal article supplement (PMC10739966; doi:10.1038/s41467-023-43438-1), 2023-12-21
Supplement: 41467_2023_43438_MOESM2_ESM.pdf [file 41467_2023_43438_MOESM2_ESM.pdf]

*ANKS1B* encoded AIDA-1 regulates social behaviors by controlling oligodendrocyte function

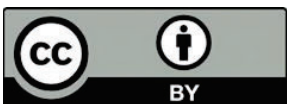

**Open Access** This file is licensed under a Creative Commons Attribution 4.0 International License, which permits use, sharing, adaptation, distribution and reproduction in any medium or format, as long as you give appropriate credit to the original author(s) and the source, provide a link to the Creative Commons license, and indicate if changes were made. In the cases where the authors are anonymous, such as is the case for the reports of anonymous peer reviewers, author attribution should be to 'Anonymous Referee' followed by a clear attribution to the source work. The images or other third party material in this file are included in the article's Creative Commons license, unless indicated otherwise in a credit line to the material. If material is not included in the article's Creative Commons license and your intended use is not permitted by statutory regulation or exceeds the permitted use, you will need to obtain permission directly from the copyright holder. To view a copy of this license, visit <http://creativecommons.org/licenses/by/4.0/>.

## REVIEWER COMMENTS

### Reviewer #1 (Remarks to the Author):

In this study, Cho et al. reported novel and interesting findings that expression of AIDA-1, encoded by ANKS1B gene in oligodendroglia, resulted in abnormal oligodendrocyte phenotypes, including impaired OPC maturation, reduced oligodendrocyte abundance, and myelination. These cellular phenotypes further led to structural abnormalities in the corpus callosum and impaired social behavior of the mice. It is intriguing that only heterozygous deletion (Olig2-Het) and Olig2-knockout of ANKS1B gene in mainly oligodendroglia, but not in forebrain excitatory neurons (CamK2a-Cre) or cerebellar Purkinje neurons (L7-Cre), cause deficits in social behavior. Furthermore, the authors showed that clemastine fumarate treatment rescued impaired social behavior in adult mice lacking ANKS1B in oligodendrocytes. These findings suggest a significant contribution of oligodendroglia dysfunction to autism-associated behavioral deficits. There are some concerns that need to be considered.

1. The main weakness of this work is the lack of mechanistic studies to explore how ANKS1B deficiency could cause the oligodendroglial phenotypes. Some interesting ideas have been discussed, such as working through Rho family GTPases, neuron-OPC synaptic junctions and signal transduction etc. However, there were no data directly showing changes in Rho family GTPases or whether manipulating those GTPases would help with the oligodendroglial phenotypes in the heterozygous deletion or knockout mice. Alternatively, it would also be helpful to have some data that indicate the involvement of AIDA-1 in neuron-OPC synapses, for example, whether AIDA-1+ puncta on oligodendroglia are synapses, whether AIDA-1 show activity-dependent translocation in OPCs etc.
2. More thorough characterizations of myelin phenotypes would be needed. For myelin deficits, typically electron microscopy analysis of myelin sheath and accompanied g-ratio analysis should be performed.
3. Did Anks1b haploinsufficiency in Nestin-Het and Olig2-Het mice, and deletion in Olig2-KO mice alter astroglial differentiation, considering that nestin and Olig2 are expressed by neural progenitor cells that can also give rise to astroglia, in addition to neurons? Using additional oligodendroglia-specific cre lines, such as PDGFRalpha-Cre would be helpful to support the conclusion that AIDA-1 has cell-autonomous effects in oligodendroglial maturation and function.
4. Data that demonstrate the decreased expression or knock out of AIDA-1 in oligodendroglia in Nestin-Het, Olig2-Het, and Olig2-KO mice should be shown.
5. In Fig. 5, it is admirable that human OPCs were used. However, those human induced OPCs (iOPCs) were not clearly defined. Were these human iOPCs differentiated from human induced pluripotent stem cells or human iOPCs induced by reprogramming methods with transcription factors? In addition, there were no data showing the identity of the human iOPCs. The authors described in the figure legend that "Olig2 antibodies used do not recognize human Olig2 in iOPCs". In fact, there are olig2 antibodies that can recognize both mouse and human Olig2, for example, Uchida et al. Sci Transl Med 2012
6. There were no histological data showing oligodendroglia and myelin following clemastine rescue? Staining of myelin markers should be shown. Electron microscopy analysis should be done as well.

### Reviewer #2 (Remarks to the Author):

This paper shows that oligodendrocyte dysfunction caused by mutation of Anks1b, one of the risk genes for neurodevelopmental disorders, is associated with behavioral abnormalities such as decreased social behavior. The authors generated mice heterozygous for Anks1b by Nestin-Cre and showed that they showed structural abnormalities in the corpus callosum and decreased

myelin formation. Furthermore, using mice heterozygous for Anks1b by Olig2-Cre, the authors found that not only myelin dysplasia but also behavioral abnormalities such as decreased social behavior are oligodendrocyte autonomous. It was also shown that administration of clemastine fumarate, which promotes myelin formation, ameliorated the decline in social behavior of mutant mice. This is an interesting study showing that abnormalities in oligodendrocyte function and myelin formation may have important effects on neurodevelopmental disorders. However, there are some problems to be solved as follows.

1) MRI data show that the volume and fractional anisotropy of the corpus callosum are reduced by Anks1b heterozygous deficiency. Is it similarly reduced in areas other than the corpus callosum? Is there region specificity?

2) The authors have shown that Anks1b heterozygous deficiency causes increased proliferation and impaired differentiation at 3 weeks to 12 months of age. Since oligodendrocyte proliferation and differentiation are active in the first few weeks of life, the number of oligodendrocyte precursor cells and oligodendrocytes and the degree of proliferation and differentiation at the earlier developmental stage (within 3 weeks of age) should be indicated.

3) It is necessary to show the molecular mechanism of how Anks1b regulates proliferation, differentiation and myelin formation. The authors have described potential interesting molecular functions in the discussion, but experimental data should be presented.

4) As stated by the authors, Olig2-Cre has been reported to be expressed in some neurons, which makes it difficult to interpret the results of this study. Reporter mice should be used to show the proportion of Olig2-Cre expressed in neurons and astrocytes in brain regions such as the corpus callosum, cerebral cortex, and cerebellum. Is there any reason not to use other oligodendrocyte lineage-specific Cre lines such as NG2-Cre and Cnp-Cre?

5) The effects of heterozygous and homozygous Anks1b using Olig2-Cre on oligodendrocytes should be compared. In Fig. 6d, the number of oligodendrocytes was decreased to the same extent in heterozygous and homozygous mice, but what is the reason for the lack of gene dosage effect?

6) Since there is no change in the expression level of interneuron markers and the number of Purkinje cells in Olig2-Cre/Anks1b heterozygous-deficient mice (Supplementary Fig. 7b, d), the authors consider that these cells have little effect on behavior. However, this alone is not enough. Given that Anks1b functions at synapses, the synaptic function of these cells may be impaired and this should be examined in detail.

7) The authors show that Anks1b-deficient mice using L7-Cre and CamK2-Cre do not show behavioral abnormalities (Fig. 7d). Anks1b is thought to regulate NMDA receptor function, but are synaptic dysfunction seen in CamK2-Cre/Anks1b-deficient mice? In addition, Nestin-Cre/Anks1b homozygous knockout mice die shortly after birth, suggesting that Anks1b also plays an important role in neurogenesis. In this case, analysis using postnatally expressed L7-Cre and CamK2-Cre is likely to show no phenotype, which is insufficient to analyze the effects of Anks1b deficiency.

8) The result that clemastine improves sociality is very interesting. It should be shown whether there is also an improvement in the number of oligodendrocytes and myelin formation. Does administration of clemastine also improve the phenotype of Nestin-Cre/Anks1b heterozygous mice?

Reviewer #3 (Remarks to the Author):

This paper by Cho C-H et al reports an unexpected role for ANKS1B in oligodendrocyte (OLG) function and a potential role for OLGs in pathophysiology of ANKS1B syndrome using the mouse model.

The purpose of this research is very interesting and novel, and most of the data are good to

explain their hypothesis. However, this reviewer has several critical points that might improve this paper as follows.

#### Major

1, Although many immunohistochemical evidences are performed to show less OLG maturation and the dysfunction, electrophysiological experiment should be added to prove less axonal conduction velocity in the corpus callosum of the model. In addition, the treatment of clemastine will result in the normalization of the conduction velocity. Thus, further electrophysiological data will strengthen this paper.

2, Although Nestin-Het mice are used as the model of human ANKS1B syndrome, unfortunately, there is no direct evidence of the relationship between AIDA-1 protein expression level and OLG dysfunction in this paper. As the symptom of neurodevelopmental disease shows spectrum, it is very important to show the relationship between AIDA-1 protein expression and behavior in Olig2-Cre driven Anks1b conditional mutant mouse.

#### Minor

1, In Fig2: It is happy for us to have western data of AIDA-1 protein in abnormal myelin sheath and reduced OLGs density in Anks1b haploinsufficiency mouse model.

2, In Fig4: Do you have some information of the relationship between AIDA-1 protein and maturation and/or migration?

3, In Fig7: AIDA-1B protein level should be investigated in the Olig2-Cre, L7-Cre, and CaMKII $\alpha$ -Cre mice to know whether the expression levels are related to the behavioral tests, especially social preference.

4, Please check the protein level of AIDA-1B in clemastine treatment.

1 We want to thank the reviewers for their valuable comments and apologize for the delay in our resubmission. It took  
2 some time to address the important concerns raised, which involved incorporating new techniques into our laboratory.  
3 Major improvements to the manuscript include a detailed mechanistic investigation and a multi-faceted verification of  
4 myelination deficits in *Anks1b* models. Using advanced G-protein biosensors, we investigated causative mechanisms  
5 linking AIDA-1 to oligodendroglial phenotypes. We find that AIDA-1 regulates Rac1 activity and that stimulating Rac1  
6 function can improve the deficits in oligodendrocyte function present in *Anks1b*-deficient mice. We also employed  
7 electron microscopy (EM) to confirm the presence of myelination deficits in mouse models and show that clemastine  
8 was effective in rescuing both myelination and social deficits in these models.

9 Below, we answer all concerns expressed by **Reviewer #1**, **Reviewer #2**, and **Reviewer #3**.

### 10 **Reviewer #1 (Remarks to the Author):**

11 In this study, Cho et al. reported novel and interesting findings that expression of AIDA-1, encoded by ANKS1B gene in  
12 oligodendroglia, resulted in abnormal oligodendrocyte phenotypes, including impaired OPC maturation, reduced  
13 oligodendrocyte abundance, and myelination. These cellular phenotypes further led to structural abnormalities in the  
14 corpus callosum and impaired social behavior of the mice. It is intriguing that only heterozygous deletion (Olig2-Het) and  
15 Olig2-knockout of ANKS1B gene in mainly oligodendroglia, but not in forebrain excitatory neurons (CamK2a-Cre) or  
16 cerebellar Purkinje neurons (L7-Cre), cause deficits in social behavior. Furthermore, the authors showed that clemastine  
17 fumarate treatment rescued impaired social behavior in adult mice lacking ANKS1B in oligodendrocytes. These findings  
18 suggest a significant contribution of oligodendroglia dysfunction to autism-associated behavioral deficits. There are  
19 some concerns that need to be considered.

20 **1. The main weakness of this work is the lack of mechanistic studies to explore how ANKS1B deficiency could cause the**  
21 **oligodendroglial phenotypes. Some interesting ideas have been discussed, such as working through Rho family GTPases,**  
22 **neuron-OPC synaptic junctions and signal transduction etc. However, there were no data directly showing changes in**  
23 **Rho family GTPases or whether manipulating those GTPases would help with the oligodendroglial phenotypes in the**  
24 **heterozygous deletion or knockout mice. Alternatively, it would also be helpful to have some data that indicate the**  
25 **involvement of AIDA-1 in neuron-OPC synapses, for example, whether AIDA-1+ puncta on oligodendroglia are synapses,**  
26 **whether AIDA-1 show activity-dependent translocation in OPCs etc.**

27 This concern represented the focus of our revisions. To search for potential mechanisms linking AIDA-1 to  
28 oligodendroglial phenotypes, we conducted a comparative analysis by cross-referencing our previously  
29 published proteomic studies identifying the AIDA-1 interactome (Carbonell AU 2019) and synaptic proteome of  
30 *Anks1b*-deficient mice (Carbonell AU 2023). This examination identified a potential link to Rho family GTPases.  
31 Using FRET-based G-protein biosensors, we found that AIDA-1 regulates Rac1 activity, as shown in **NEW Figure 6**  
32 **(h, i) and NEW Supplementary Figure 10 (a, b)**. Moreover, we find that stimulating Rac1 activity can effectively  
33 restore deficits in maturation in oligodendrocytes derived from *Anks1b* models, as shown in **NEW Figure 6 (j, k)**  
34 **and NEW Supplementary Figure 10 (f)**. This discovery is significant because previous research has established  
35 the crucial role of Rho family GTPases, and particularly Rac1, in the maturation of OPCs and myelination, which  
36 are the primary deficiencies observed in *Anks1b*-deficient mice.

37 **2. More thorough characterizations of myelin phenotypes would be needed. For myelin deficits, typically electron**  
38 **microscopy analysis of myelin sheath and accompanied g-ratio analysis should be performed.**

39 We conducted the suggested experiments and are happy to report that the results validate our main  
40 conclusions. In **NEW Figure 2 (c, d)**, electron microscopy and g-ratio analyses of callosal axons reveal clear  
41 myelination deficits in Nestin-Het mice, and in **NEW Figure 5 (g, h)**, similar analyses confirm myelination deficits  
42 in Olig2-Het mice.

43 **3. Did *Anks1b* haploinsufficiency in Nestin-Het and Olig2-Het mice, and deletion in Olig2-KO mice alter astroglial**  
44 **differentiation, considering that nestin and Olig2 are expressed by neural progenitor cells that can also give rise to**  
45 **astroglia, in addition to neurons?**

46 Western blots in **NEW Figure 4 (d)** confirm that AIDA-1 is not expressed in astrocytes. This result validates  
47 findings from multiple single cell transcriptomic databases like Tabula Muris, The Allen Institute Cell Atlas, and  
48 the Broad Institute (**Supplementary Figure 4**), which show that *Anks1b* transcripts are not expressed in  
49  
50  
51  
52  
53

54 astrocytes. Therefore, any potential deficits would likely have indirect causes, although casual observations did  
55 not reveal any obvious astrocytic deficits using GFAP staining in cultures and slices.

56  
57 **Using additional oligodendroglia-specific cre lines, such as PDGFRalpha-Cre would be helpful to support the conclusion**  
58 **that AIDA-1 has cell-autonomous effects in oligodendroglial maturation and function.**

59 We understand the suggestion, but limitations associated with all promoters used in oligodendrocyte research  
60 weakened the arguments needed to overcome the temporal and financial constraints associated with creating  
61 another mouse model. It is important to note that increasingly detailed single-cell transcriptomic experiments  
62 and evidence of transient promoter expression in diverse cell lines reveal that even promoters previously  
63 confirmed as “specific” may not exhibit absolute specificity (Tognatta R, 2016). For example, the Allen Brain Cell  
64 Atlas, DropViz, and Tabula Muris databases all show that PDGFRA is expressed in diverse interneurons of the  
65 CNS as well as in different organs throughout the body, which would be problematic. Other oligodendrocyte  
66 promoters such as NG2 can be found in various cell types, including astrocytes, pericytes, and diverse cells  
67 throughout the body, and NG2-positive cells have been found to adopt neuronal markers both *in vitro* and *in*  
68 *vivo*. CNPase has also been implicated in microglial function, and its expression has been detected in different  
69 organs, including astrocytes in the brain. CNP-GFP has also been found in Nestin+ but NG2- cells in culture,  
70 which suggests a neuronal expression. It is noteworthy that among commonly used oligodendrocyte promoters,  
71 Olig2 shows the highest specificity for oligodendrocyte lineage cells based on single-cell transcriptomic  
72 databases. However, we agree that this is a caveat to consider in our work and have expanded our discussion to  
73 address these complexities and potential limitations in our study.

74  
75 Therefore, to address these concerns we have conducted a series of experiments to test the oligodendrocyte-  
76 autonomous nature of the observed phenotypes and rescues. Here are the key findings:

77 Specific Reduction of AIDA-1 in oligodendrocytes: In **New Figure 5 (i, j)**, Western blots show that AIDA-1 protein  
78 expression is selectively decreased in oligodendrocytes but not in neurons isolated from Olig2-Het mice. No  
79 expression is observed in astrocytes.

80 No changes in AIDA-1 levels in total brain lysates: The same Western blots reveal no discernable differences in  
81 AIDA-1 protein expression in total brain lysates between genotypes. Because heterozygosity in a small subset of  
82 cells would not be detectable by Western blot, this result is consistent with specific recombination in OPCs and  
83 oligodendrocytes that represent only 5-10% of all brain cells.

84 Specific deficits in isolated oligodendrocytes: Imaging studies and Western blots in **New Figure 6 (a, b) and**  
85 **Supplementary Figure 10 (c, d)** show that oligodendrocytes isolated from Olig2-Het mice, as well as rat  
86 oligodendrocytes treated with AIDA-1 specific shRNAs, exhibit deficits in maturation and MBP production.

87 Clemastine Rescue: Imaging studies and Western blots in **New Figure 8 (a, b), and Supplementary Figure 10 (f)**  
88 shows that clemastine, an antihistamine that improves myelination by enhancing OPC maturation, effectively  
89 rescues the maturation deficits in primary oligodendrocytes isolated from Olig2-Het mice. This is observed in the  
90 absence of neurons.

91  
92 In summary, these experiments corroborate our assertion that oligodendrocyte-autonomous dysfunctions are  
93 responsible for the myelination deficits observed in Olig2-Het mice. Together with our findings that clemastine  
94 rescues behavioral deficits in Olig2-Het mice, we present strong evidence that deficits in oligodendrocytes and  
95 myelination are the root cause of the observed social deficits.

96  
97 **4. Data that demonstrate the decreased expression or knock out of AIDA-1 in oligodendroglia in Nestin-Het, Olig2-Het,**  
98 **and Olig2-KO mice should be shown.**

99 As discussed above, we have now conducted these important control experiments. Western blots in **NEW Figure**  
100 **5 (i, j)** reveal that AIDA-1 expression is specifically reduced in oligodendrocytes isolated from Olig2-Cre mice.  
101 These results confirm haploinsufficiency in this model. In addition, we find that reduced AIDA-1 expression is  
102 unique to oligodendrocytes and is not observed in neurons.

103  
104 **5. In Fig. 5, it is admirable that human OPCs were used. However, those human induced OPCs (iOPCs) were not clearly**  
105 **defined. Were these human iOPCs differentiated from human induced pluripotent stem cells or human iOPCs induced by**  
106 **reprogramming methods with transcription factors? In addition, there were no data showing the identity of the human**

107 iOPCs. The authors described in the figure legend that “Olig2 antibodies used do not recognize human Olig2 in iOPCs”. In  
108 fact, there are olig2 antibodies that can recognize both mouse and human Olig2, for example, Uchida et al. *Sci Transl*  
109 *Med* 2012.

110 We have removed the human OPCs from our manuscript as their inclusion did not contribute significantly to our  
111 findings. Additionally, it is worth noting that the company (Tempo Bioscience) was unable or unwilling to  
112 disclose the methodology used in the generation of these human iOPCs.

113  
114 6. There were no histological data showing oligodendroglia and myelin following clemastine rescue? Staining of myelin  
115 markers should be shown. Electron microscopy analysis should be done as well.

116 We conducted the more conclusive EM studies proposed and in **NEW Figure 8 (h, i)** show that clemastine  
117 treatment, which rescues social deficits in Olig2-Het mice, also leads to an increase in myelination as measured  
118 by EM and g-ratio analyses of callosal axons.

119  
120 Reviewer #2 (Remarks to the Author):

121  
122 This paper shows that oligodendrocyte dysfunction caused by mutation of *Anks1b*, one of the risk genes for  
123 neurodevelopmental disorders, is associated with behavioral abnormalities such as decreased social behavior. The  
124 authors generated mice heterozygous for *Anks1b* by Nestin-Cre and showed that they showed structural abnormalities  
125 in the corpus callosum and decreased myelin formation. Furthermore, using mice heterozygous for *Anks1b* by Olig2-Cre,  
126 the authors found that not only myelin dysplasia but also behavioral abnormalities such as decreased social behavior are  
127 oligodendrocyte autonomous. It was also shown that administration of clemastine fumarate, which promotes myelin  
128 formation, ameliorated the decline in social behavior of mutant mice. This is an interesting study showing that  
129 abnormalities in oligodendrocyte function and myelin formation may have important effects on neurodevelopmental  
130 disorders. However, there are some problems to be solved as follows.

131  
132 1) MRI data show that the volume and fractional anisotropy of the corpus callosum are reduced by *Anks1b* heterozygous  
133 deficiency. Is it similarly reduced in areas other than the corpus callosum? Is there region specificity?

134 We apologize if this was not clear, but these data had been included in **Supplementary Table 1**. In summary, this  
135 table shows notable deficits in specific brain regions of mice, as revealed by both diffusion tensor imaging (DTI)  
136 and MRI. Furthermore, we now include an extensive DTI analysis of two human patients, comparing their results  
137 to a standardized group of 101 neurotypical controls using a robust analytical pipeline (**NEW Figure 1 (b-d)**).

138 These rigorous findings highlight significant region-specific abnormalities of white matter microstructure in the  
139 brains of patients. These important human experiments were conducted in collaboration with the renowned  
140 radiologist Michael Lipton, who is widely known for his leadership in the Einstein Soccer study showing the  
141 potential for brain injury from headings in soccer.

142  
143 2) The authors have shown that *Anks1b* heterozygous deficiency causes increased proliferation and impaired  
144 differentiation at 3 weeks to 12 months of age. Since oligodendrocyte proliferation and differentiation are active in the  
145 first few weeks of life, the number of oligodendrocyte precursor cells and oligodendrocytes and the degree of  
146 proliferation and differentiation at the earlier developmental stage (within 3 weeks of age) should be indicated.

147 **Figure 3 (b, c)** and **Supplementary Fig 3 (a)** provides precise data on the number of oligodendrocyte lineage cells  
148 per cubic millimeter in the corpus callosum for all ages tested. The figures provide specific counts for CC1-  
149 positive cells (oligodendrocytes) and PDGFR $\alpha$ -positive cells (OPCs) at these same ages. The 3-week time point  
150 reflects the number of cells that express EdU within the month after pregnant females were injected at  
151 embryonic age of 18.5 days, which covers several critical windows in oligodendrocyte development. Results  
152 show that there was an average decrease of over 1000 CC1+ cells (indicating oligodendrocytes) and an increase  
153 of over 1000 PDGFR $\alpha$ + cells (indicating OPCs) per cubic mm in the Nestin-Het mice.

154  
155 3) It is necessary to show the molecular mechanism of how *Anks1b* regulates proliferation, differentiation and myelin  
156 formation. The authors have described potential interesting molecular functions in the discussion, but experimental data  
157 should be presented.

158 We agree this was a weakness in our work and so performed major experiments to identify mechanisms linking  
159 *Anks1b* to oligodendroglial phenotypes. Briefly, we found that AIDA-1 regulates Rac1 activity and that Rac1



160 stimulation can restore maturation deficits found in oligodendrocytes isolated from *Anks1b* Olig2-Het mice.  
161 Please see our response to point 1 from Reviewer 1 (lines 30-39) and see **New Figure 6**.  
162

163 4) As stated by the authors, Olig2-Cre has been reported to be expressed in some neurons, which makes it difficult to  
164 interpret the results of this study. Reporter mice should be used to show the proportion of Olig2-Cre expressed in  
165 neurons and astrocytes in brain regions such as the corpus callosum, cerebral cortex, and cerebellum. Is there any  
166 reason not to use other oligodendrocyte lineage-specific Cre lines such as NG2-Cre and Cnp-Cre?

167 To address this concern, we performed experiments to determine whether results observed were due to  
168 oligodendrocyte-autonomous effects in lieu of generating additional mouse models (Please see our response to  
169 point 3 from Reviewer 1 (lines 59-95)). We also refer the reviewer to **NEW Figure 4 (d)**, which represents a  
170 Western blot confirming that AIDA-1 is not expressed in astrocytes, and **New Figure 5 (i, j)**, which reveals that  
171 AIDA-1 protein expression is selectively decreased in oligodendrocytes but not in neurons isolated from Olig2-  
172 Het mice.  
173

174 5) The effects of heterozygous and homozygous *Anks1b* using Olig2-Cre on oligodendrocytes should be compared. In  
175 Fig. 6d, the number of oligodendrocytes was decreased to the same extent in heterozygous and homozygous mice, but  
176 what is the reason for the lack of gene dosage effect?

177 We appreciate the question but currently lack an explanation for the observed lack of gene dosage effect in  
178 experiments counting oligodendrocytes in slices (**Fig. 5 (d)**), while apparent gene dosage effects are evident in  
179 behavioral experiments (**Fig. 7 (b, c, d)**). The focus of this study has been on Nestin and Olig2 heterozygotes. This  
180 was done to investigate haploinsufficiency, as all identified patients are heterozygous for the microdeletions.  
181

182 6) Since there is no change in the expression level of interneuron markers and the number of Purkinje cells in Olig2-  
183 Cre/*Anks1b* heterozygous-deficient mice (Supplementary Fig. 7b, d), the authors consider that these cells have little  
184 effect on behavior. However, this alone is not enough. Given that *Anks1b* functions at synapses, the synaptic function of  
185 these cells may be impaired and this should be examined in detail.

186 It is important to note that we neither believe nor do we argue that neuronal deficits are dispensable in the  
187 pathophysiology of ANDS. Patients are ubiquitously heterozygous and we have previously shown that AIDA-1  
188 regulates NMDAR function and synaptic plasticity in the hippocampus (Tindi et al 2015), which would be  
189 expected to influence cognitive and affective behaviors. Indeed, we show that Olig2-Het mice do not  
190 recapitulate all behaviors found in Nestin-Het mice. Our interpretation is that there are cell-specific  
191 contributions to the behavioral deficits found in mouse model of ANDS and here we have focused on social  
192 preference.  
193

194 However, we recognize that a limitation of our work is that we cannot fully rule out the influence of a small set  
195 of interneurons and have now stated this in the discussion. This subset would be small because Western blot  
196 analyses failed to reveal any changes in AIDA-1 brain expression in total lysate between genotypes. Therefore,  
197 we would first need to identify this subset of neurons to be able to perform electrophysiological tests, which  
198 would be a daunting task. However, it is important to note that even if identified, defining the origins of synaptic  
199 effects may be difficult because changes in myelination could affect synaptic plasticity through input  
200 desynchronization and changes in conduction speeds. Indeed, recent and compelling papers highlight the vital  
201 role of myelination dynamics in memory consolidation, a process that requires synaptic plasticity.  
202

203 Our study provides robust causal evidence linking myelination deficits to social deficits in Olig2-Het mice, since  
204 clemastine, an anti-histamine that can rescue OPC maturation and myelination, effectively restores myelination  
205 and normalizes social behaviors in Olig2-Het mice. Overall, the strength of our study is that we provide  
206 compelling evidence that both human patients and mice exhibit impaired myelination and provide strong  
207 evidence that deficits in social behaviors present in ANDS originate from oligodendrocyte dysfunction.  
208

209 7) The authors show that *Anks1b*-deficient mice using L7-Cre and CamK2-Cre do not show behavioral abnormalities (Fig.  
210 7d). *Anks1b* is thought to regulate NMDA receptor function, but are synaptic dysfunction seen in CamK2-Cre/*Anks1b*-  
211 deficient mice? In addition, Nestin-Cre/*Anks1b* homozygous knockout mice die shortly after birth, suggesting that



212 *Anks1b* also plays an important role in neurogenesis. In this case, analysis using postnatally expressed L7-Cre and  
213 CamK2-Cre is likely to show no phenotype, which is insufficient to analyze the effects of *Anks1b* deficiency.

214 We previously published that CamK2a-Cre *Anks1b* mice do have a phenotype, which includes impaired NMDAR  
215 signaling and plasticity in the hippocampus (Tindi JO et al 2015). Also, as discussed in our response to point 6, we  
216 do not believe that oligodendrocyte deficits are the only cause of the pathophysiology of ANDS. We agree that  
217 *Anks1b* likely plays a critical role in development because no homozygous ANDS patient has been identified and  
218 Nestin-KO mice are indeed lethal. However, in **Supplementary Figure 3 (b)**, we perform BrdU experiments to  
219 measure neurogenesis in both subventricular zone and subgranular zones but see no difference in cell birth  
220 between Nestin-Het mice and WT.

221  
222 8) The result that clemastine improves sociality is very interesting. It should be shown whether there is also an  
223 improvement in the number of oligodendrocytes and myelin formation. Does administration of clemastine also improve  
224 the phenotype of Nestin-Cre/*Anks1b* heterozygous mice?

225 We acknowledge that this was a weakness in our previous submission and have performed EM analyses to  
226 evaluate the outcomes of clemastine treatment. In **NEW Figure 8 (h, i)** we show electron microscopy and g-ratio  
227 analyses of callosal axons in mice that received clemastine treatment. Results show that in addition to rescuing  
228 social deficits in Olig2-Het mice, clemastine also leads to an increase in myelination.

229  
230 We have not tested the effects of clemastine on Nestin-Het mice but are doing these experiments in a followup  
231 study testing the effects of clemastine of diverse mouse models of ASD.

232  
233 **Reviewer #3 (Remarks to the Author):**

234  
235 This paper by Cho C-H et al reports an unexpected role for ANKS1B in oligodendrocyte (OLG) function and a potential  
236 role for OLGs in pathophysiology of ANKS1B syndrome using the mouse model.

237 The purpose of this research is very interesting and novel, and most of the data are good to explain their hypothesis.  
238 However, this reviewer has several critical points that might improve this paper as follows.

239  
240 **Major**

241 1, Although many immunohistochemical evidences are performed to show less OLG maturation and the dysfunction,  
242 electrophysiological experiment should be added to prove less axonal conduction velocity in the corpus callosum of the  
243 model. In addition, the treatment of clemastine will result in the normalization of the conduction velocity. Thus, further  
244 electrophysiological data will strengthen this paper.

245 We agree that this would be a good functional outcome of our observations. We have instead used behavioral  
246 outcomes as our highest-order readout for the observed myelination defects. Overall, the strength of our study  
247 is that we provide compelling evidence that both human patients and mice exhibit impaired myelination and  
248 provide strong evidence that deficits in social behaviors present in ANDS originate from oligodendrocyte  
249 dysfunctions.

250  
251 2, Although Nestin-Het mice are used as the model of human ANKS1B syndrome, unfortunately, there is no direct  
252 evidence of the relationship between AIDA-1 protein expression level and OLG dysfunction in this paper. As the  
253 symptom of neurodevelopmental disease shows spectrum, it is very important to show the relationship between AIDA-1  
254 protein expression and behavior in Olig2-Cre driven *Anks1b* conditional mutant mouse.

255 We completely agree with this assessment and have now conducted these important control experiments.  
256 Western blots In **NEW Figure 5 (i, j)** reveal that AIDA-1 expression is specifically reduced in oligodendrocytes  
257 isolated from Olig2-Cre mice. These results confirm haploinsufficiency in this model. In addition, we find that  
258 reduced AIDA-1 expression is unique to oligodendrocytes and is not observed in neurons, which significantly  
259 bolsters our assertion of the specific targeting of oligodendrocyte lineage cells using Olig2-Cre lines.

260  
261 **Minor**

262 1, In Fig2: It is happy for us to have western data of AIDA-1 protein in abnormal myelin sheath and reduced OLGs density  
263 in *Anks1b* haploinsufficiency mouse model.

264 As described above, please see **New Figure 5 (i,j)**, where Western blots show reduced AIDA-1 expression  
265 specifically in oligodendrocytes isolated from Olig2-Het mice. Also, please see our previous publication  
266 (Carbonell AU 2019, Nature Comms) where we show AIDA-1 haploinsufficiency in the Nestin-Het mice.  
267

268 **2, In Fig4: Do you have some information of the relationship between AIDA-1 protein and maturation and/or migration?**

269 Western blots in **NEW Supplementary Figure 10 (c)** show that AIDA-1 levels remain relatively stable (or perhaps  
270 increase slightly) in maturing OPCs/oligodendrocytes in culture.  
271

272 **3, In Fig7: AIDA-1B protein level should be investigated in the Olig2-Cre, L7-Cre, and CaMKIIa-Cre mice to know whether  
273 the expression levels are related to the behavioral tests, especially social preference.**

274 Please see our previous publication (Tindi JO et al 2015, Journal of Neuroscience) where we show that AIDA-1 is  
275 decreased in the CaMKII $\alpha$ -Cre model, as well as our previous publication (Carbonell AU et al 2019, Nature  
276 communications) where we show that AIDA-1 is decreased in Nestin-Het mice. Also please see our response  
277 your major point 2. **New Figure 5 (i,j)** shows that AIDA-1 is reduced specifically in oligodendrocytes in Olig2-Het  
278 mice, which confirms that social preference deficits are correlated with reduced AIDA-1 in oligodendrocytes.  
279

280 **4, Please check the protein level of AIDA-1B in clemastine treatment.**

281 We performed Western blots to test this and in **NEW Supp Fig 10 (f)** show that clemastine has no effects on the  
282 expression of AIDA-1, Rac1, or Olig2.  
283  
284

## REVIEWERS' COMMENTS

Reviewer #2 (Remarks to the Author):

I have no additional comments as the content has been greatly improved and the molecular mechanism is also shown.

Reviewer #3 (Remarks to the Author):

This paper by Cho C-H et al. well revised with new technique, and most of my questions and other reviewer's questions are answered with further experiments and additional explanation in the discussion. This reviewer has no more comments and now recommends the acceptance to this high level of journal.
